# Supplementary material for: Simultaneously tuning cationic and anionic redox in a P2-Na0.67Mn0.75Ni0.25O2 cathode material through synergic Cu/Mg co-doping
Source: Royal Society of Chemistry journal article supplement (doi:10.1039/c9ta00968j), 2019-01-01
Supplement: c9ta00968j1.pdf [file c9ta00968j1.pdf]

## Supporting information

### **Simultaneously tuning cationic and anionic redox in P2-Na<sub>0.67</sub>Mn<sub>0.75</sub>Ni<sub>0.25</sub>O<sub>2</sub> cathode material through a synergic Cu/Mg co-doping**

Weijin Kong<sup>a</sup>, Rui Gao<sup>a</sup>, Qingyuan Li<sup>a</sup>, Wenyun Yang<sup>b</sup>, Jinbo Yang<sup>b</sup>, Limei Sun<sup>c</sup> and Xiangfeng

Liu<sup>a\*</sup>

<sup>a</sup> Center of Materials Science and Optoelectronics Engineering, College of Materials Science and Opto-Electronic Technology, University of Chinese Academy of Sciences, Beijing 100049, P. R.

China

<sup>b</sup> State Key Laboratory for Mesoscopic Physics, School of Physics, Peking University, Beijing

100871, China

<sup>c</sup> Department of Nuclear Physics, China Institute of Atomic Energy, Beijing 102413, China

\*Corresponding Author: liuxf@ucas.ac.cn. (X.L.) Tel. +86 10 8825 6840

**Table S1 Atoms occupancy of Bare from Rietveld refinement.**

| Atom | Site | x   | y   | z       | Occ  |
|------|------|-----|-----|---------|------|
| Nae  | 2b   | 0   | 0   | 1/4     | 0.25 |
| Naf  | 2d   | 1/3 | 2/3 | 3/4     | 0.42 |
| Mn   | 2a   | 0   | 0   | 0       | 0.75 |
| Ni   | 2a   | 0   | 0   | 0       | 0.25 |
| O    | 4f   | 1/3 | 2/3 | 0.09628 | 1    |

**Table S2 Atoms occupancy of Cu<sub>0.04</sub> from Rietveld refinement.**

| Atom | Site | x   | y   | z       | Occ  |
|------|------|-----|-----|---------|------|
| Nae  | 2b   | 0   | 0   | 1/4     | 0.25 |
| Naf  | 2d   | 1/3 | 2/3 | 3/4     | 0.42 |
| Mn   | 2a   | 0   | 0   | 0       | 0.71 |
| Ni   | 2a   | 0   | 0   | 0       | 0.25 |
| Cu   | 2a   | 0   | 0   | 0       | 0.04 |
| O    | 4f   | 1/3 | 2/3 | 0.09556 | 1    |

**Table S3 Atoms occupancy of Mg<sub>0.04</sub> from Rietveld refinement.**

| Atom | Site | x   | y   | z       | Occ  |
|------|------|-----|-----|---------|------|
| Nae  | 2b   | 0   | 0   | 1/4     | 0.25 |
| Naf  | 2d   | 1/3 | 2/3 | 3/4     | 0.42 |
| Mn   | 2a   | 0   | 0   | 0       | 0.71 |
| Ni   | 2a   | 0   | 0   | 0       | 0.25 |
| Cu   | 2a   | 0   | 0   | 0       | 0.04 |
| O    | 4f   | 1/3 | 2/3 | 0.09641 | 1    |

**Table S4 Atoms occupancy of Cu<sub>0.02</sub>Mg<sub>0.02</sub> from Rietveld refinement.**

| Atom | Site | x   | y   | z       | Occ  |
|------|------|-----|-----|---------|------|
| Nae  | 2b   | 0   | 0   | 1/4     | 0.25 |
| Naf  | 2d   | 1/3 | 2/3 | 3/4     | 0.42 |
| Mn   | 2a   | 0   | 0   | 0       | 0.71 |
| Ni   | 2a   | 0   | 0   | 0       | 0.25 |
| Cu   | 2a   | 0   | 0   | 0       | 0.02 |
| Mg   | 2a   | 0   | 0   | 0       | 0.02 |
| O    | 4f   | 1/3 | 2/3 | 0.09713 | 1    |

**Table S5 The loading mass for the electrodes in rate and cycling tests(0.1C).**

| Samples         | Bare   | Cu <sub>0.04</sub> | Mg <sub>0.04</sub> | Cu <sub>0.02</sub> Mg <sub>0.02</sub> |
|-----------------|--------|--------------------|--------------------|---------------------------------------|
| Rate test(mg)   | 1.9545 | 1.9424             | 1.9473             | 1.9579                                |
| Cycle tests(mg) | 1.9523 | 1.9478             | 1.9517             | 1.9622                                |

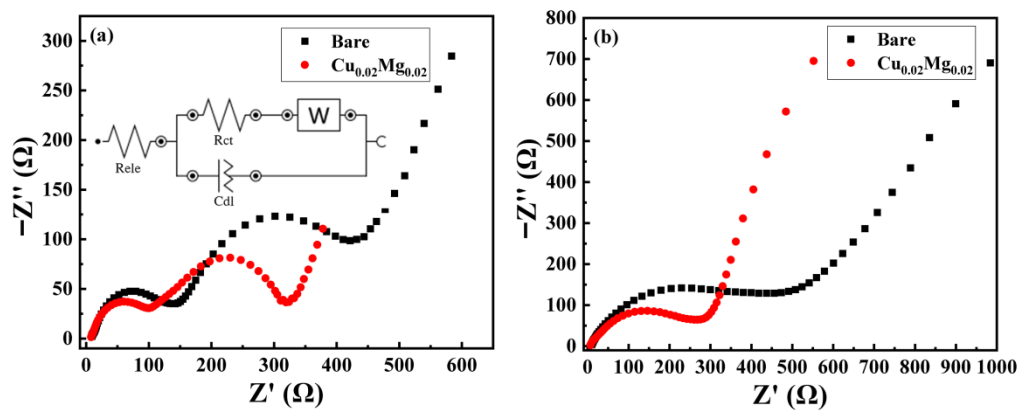

**Figure S1** The Nyquist plots measured before and after 100 cycles.

**Table S6** The simulation results of EIS before and after 100 cycles.

| Samples                       | $R_{le}(\Omega)$ | $R_{ct}(\Omega)$ |
|-------------------------------|------------------|------------------|
| Bare(before)                  | 11.25            | 129.35           |
| $Cu_{0.02}Mg_{0.02}$ (before) | 7.67             | 102.80           |
| Bare(after)                   | 7.48             | 414.08           |
| $Cu_{0.02}Mg_{0.02}$ (after)  | 5.82             | 195.39           |

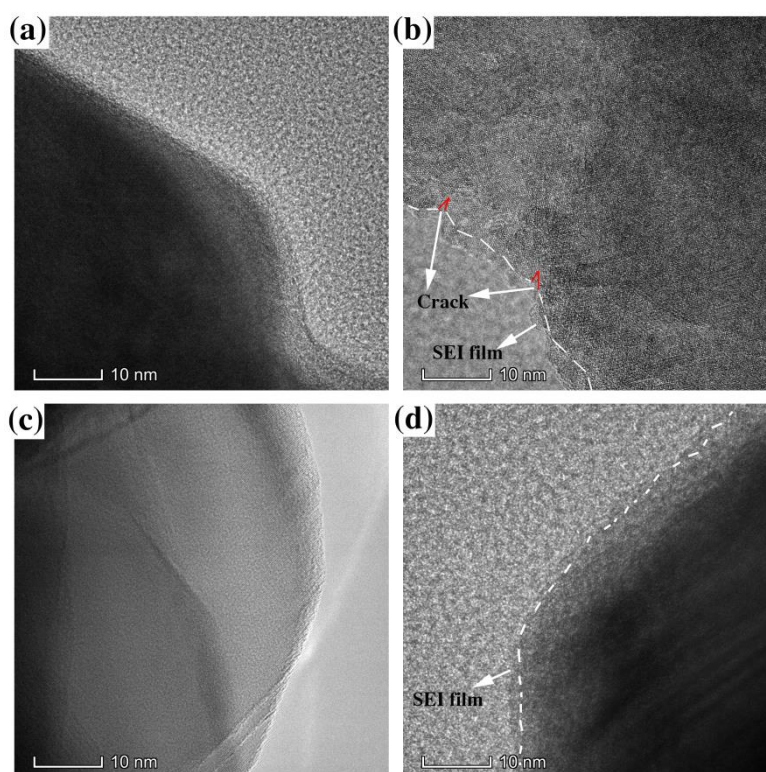

**Figure S2** The HRTEM images of the bare (a,b) and  $Cu_{0.02}Mg_{0.02}$  (c,d) cathode materials measured before and after 100 cycles.

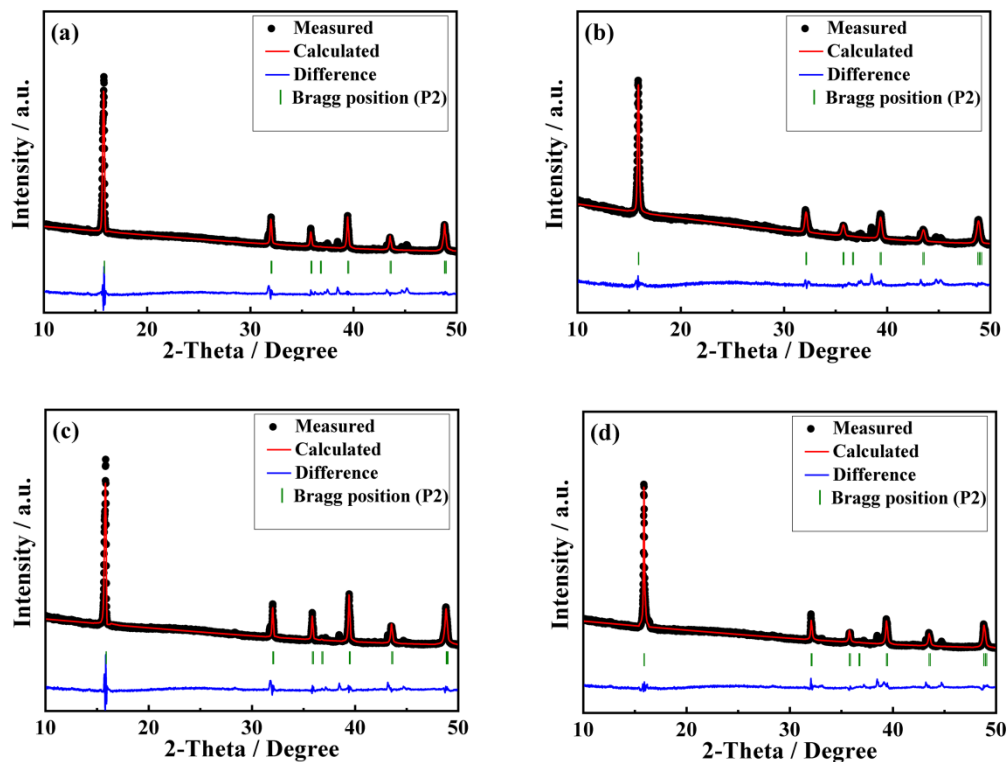

**Figure S3** The refinement results of the bare (a,b) and Cu<sub>0.02</sub>Mg<sub>0.02</sub> (c,d) cathode materials by the XRD measured before and after 100 cycles.

**Table S7** The variation of lattice parameters for the bare and Cu<sub>0.02</sub>Mg<sub>0.02</sub> cathode before and after 100 cycles by the Rietveld refinement.

| Samples | Bare | Cu <sub>0.02</sub> Mg <sub>0.02</sub> |
|---------|------|---------------------------------------|
| Δa(%)   | 0.6  | 0.2                                   |
| Δc(%)   | 0.3  | 0.16                                  |
| ΔV(%)   | 0.5  | 0.3                                   |
